# Supplementary material
Source: HighWire-hosted journal article supplement (https://jnm.snmjournals.org/highwire/filestream/95305/field_highwire_adjunct_files/0/202721_Supplemental_Data.pdf)

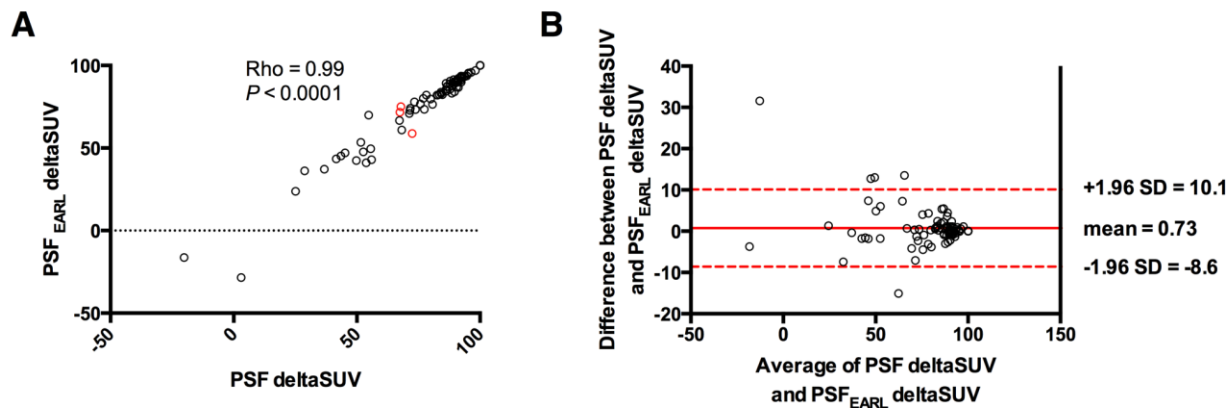

**Supplemental Figure 1**

Supplement: 202721_Supplemental_Data.pdf [file 202721_Supplemental_Data.pdf]
